# Supplementary material
Source: PubMed Central journal article supplement (PMC3406848)
Supplement: 1205995109_pnas.201205995SI.pdf [file 1205995109_pnas.201205995SI.pdf]

# Supporting Information

Bhatt et al. 10.1073/pnas.1205995109

## SI Materials and Methods

**Cell Isolation and Culture.** Primary B cells were isolated by negative selection from donor buffy coats using the B-cell isolation kit II (Miltenyi) as per the manufacturer's directions. Cells were cultured at 37 °C with 5% CO<sub>2</sub> in filter-sterilized RPMI 1640 medium supplemented with 10% FBS, 100 U/mL each of penicillin and streptomycin, 0.075% NaHCO<sub>3</sub>, and 0.05 mM 2-mercaptoethanol. Purity of the isolated B cells was determined by staining with phycoerythrin-conjugated anti-CD19 antibodies (Miltenyi) and analyzed on a MACSQuant VYB (Miltenyi). Purity ranged from 89% to 98%. Primary effusion lymphoma (PEL) cell lines were cultured in identical media and culture conditions as described (1). Lymphoblast cell line were generated by infecting freshly isolated primary human B cells with Epstein-Barr virus (EBV), using described protocols (2). Follicular lymphoma cells were cultured as described (3). CA46, a Burkitt lymphoma cell line, was purchased from ATCC and maintained in RPMI 1640 medium supplemented with 20% FBS and 100 U/mL penicillin and streptomycin. All cell lines were cultured in PEL growth medium for every experiment.

**Chemical Compounds.** C75, 2-deoxy-D-glucose (2DG), and lipopolysaccharide (LPS) were purchased from Sigma Aldrich. LY294002 was purchased from Calbiochem. C75 and LY294002 were suspended in DMSO, 2DG in H<sub>2</sub>O, and LPS in PBS. All cells were treated for indicated time periods. For visualizing intracellular lipids, the lipophilic dye Nile Red (AAT Bioquest), was used per the manufacturer's direction. A Nikon Eclipse Ti microscope equipped with NIS Elements imaging software was used to acquire images.

**Cell Viability Assays.** To determine the susceptibility of both cell types to various inhibitors, 2 × 10<sup>5</sup> PEL or primary B cells were cultured in growth medium containing compounds at increasing concentrations, or the appropriate vehicle controls, for indicated lengths of time. Cell viability was determined in quadruplicate by trypan blue exclusion. Proliferation was measured by using the Cell Titer 96Aqueous One Solution (Promega) and apoptosis was measured by using the ApoAlert Caspase-3 assay (Clontech), both according to the manufacturer's instructions, and absorbance was measured by using a FLUOstar OPTIMA (BMG Labtech) plate reader. Additionally, cell viability was also measured by using forward and side scatter parameters from flow cytometry performed on a MACSQuant VYB (Miltenyi).

**Immunoblotting.** After indicated treatments, cells were washed with ice-cold PBS and then lysed in a buffer containing 150 mM NaCl, 50 mM Tris-HCl at pH 8, 0.1% Nonidet P-40, 50 mM NaF, 30 mM β-glycerophosphate, 1 mM Na<sub>3</sub>VO<sub>4</sub>, and 1× Complete Protease Inhibitor mixture (Roche Diagnostics). Protein concentration was determined by Bradford assay, and equal amounts of proteins were separated by using SDS/PAGE, transferred onto Hybond-ECL nitrocellulose membranes (GE Healthcare), blocked, and incubated in appropriate antibodies overnight at 4 °C. The antibodies used were against fatty acid synthase, phospho-AKT Ser<sup>473</sup> (Cell Signaling Technology), and Ku 70/80 as a loading control (a generous gift of Dale Ramsden, University of North Carolina, Chapel Hill, NC). Blots were incubated in appropriate secondary antibodies conjugated to horseradish peroxidase, and bands were visualized by using chemiluminescence (GE Corporation). Densitometry was performed by using NIH ImageJ.

**Measurement of Glycolytic Flux.** Glycolytic flux was measured as described (4). Briefly, 2 × 10<sup>6</sup> cells of each type were incubated with indicated compounds for 72 h, after which cells were washed twice in PBS and starved for 30 min by suspension in glucose-free Krebs solution, followed by a 1-h pulse with 10 μCi of D-[5-<sup>3</sup>H](N)-glucose (Perkin-Elmer) and nonlabeled glucose, adjusted to a final glucose concentration of 10 mM. Equal volume of 0.2 M HCl was added to all samples to stop the reaction after which [<sup>3</sup>H]-H<sub>2</sub>O generated via glycolysis was separated from the D-[5-<sup>3</sup>H](N)-glucose bolus by evaporation-mediated equilibration in sealed chambers. Levels of [<sup>3</sup>H]-H<sub>2</sub>O were measured on a liquid scintillation counter (Wallac), and glycolytic flux was determined by normalizing counts per million to the total protein input. These and all subsequently described data were analyzed by using a two-tailed type II Student's *t* test for significance; *P* values are indicated at appropriate locations within figure legends.

**Measurement of Lipid Synthesis and Analysis of Newly Synthesized Lipid Classes.** Lipid synthesis was measured as described (5). Briefly, 1 × 10<sup>6</sup> B cells were incubated with indicated compounds for 72 h; 12 h before harvest and subsequent analysis, growth medium of all cells was supplemented with D-[U-<sup>14</sup>C<sub>6</sub>]-glucose, after which cells were collected, washed three times with PBS, and then lysed by vortexing in 0.5% Nonidet P-40 in water. Lipids were extracted by sequentially mixing in 1 mL of methanol, 2 × 1 mL of CHCl<sub>3</sub> and 1 mL of H<sub>2</sub>O, with extensive vortexing after addition of each solvent. To resolve aqueous and organic phases, tubes were centrifuged for 10 min at 2,000 × *g* in a tabletop centrifuge. The organic phase was transferred to a fresh tube, and excess CHCl<sub>3</sub> was evaporated. Extracted lipids were dissolved in 100 μL of CHCl<sub>3</sub> and counted by using scintillation fluid (Scintisafe) in a liquid scintillation counter (Wallac). Counts per million was normalized to the total protein input. Analysis of lipid components was performed by the University of North Carolina Nutrition and Obesity Research Center by using described methods (6).

**Measurement of Fatty Acid Oxidation.** Fatty acid oxidative capacity was determined by measuring 1-<sup>14</sup>C-oleate oxidation to CO<sub>2</sub> as described (7). Briefly, 1 × 10<sup>6</sup> B cells were incubated with indicated compounds for 72 h, after which cells were resuspended in normal growth media supplemented with 12.5 mM Hepes at pH 7.4 and 500 μM 1-<sup>14</sup>C-oleate (Perkin-Elmer) complexed with 0.5% BSA (Sigma) and incubated for 2 h at 37 °C. A result of 1-<sup>14</sup>C-oleate oxidation is release of radiolabeled bicarbonate into the growth medium, which was collected at the end of 2 h and transferred to custom wells. Medium was acidified with HClO<sub>4</sub> and resulting <sup>14</sup>CO<sub>2</sub> was captured in 1 M NaOH over 1 h and counted by using liquid scintillation (Wallac). Specific activity was calculated after normalization of counts per million to protein content.

**Metabolic Profiling.** Glycolytic and fatty acid metabolite profiles were obtained to assess the relative distribution of various intracellular and extracellular metabolites of PEL and primary B cells by culturing all cells for 3 d in growth media described above at a starting concentration of 1 × 10<sup>6</sup> cells per mL, after which cells were washed twice in PBS and cell pellets were flash frozen. The conditioned growth media of cultured cells was also collected after centrifugation and flash frozen. Further sample preparation, metabolic profiling, peak identification, and curation was performed by Metabolon using described methods (8).
